# Supplementary material for: Geoscientist’s views about science communication: predicting willingness to communicate geoscience
Source: Copernicus journal article supplement (doi:10.5194/egusphere-2022-1160), 2022-11-09
Supplement: Supplementary file 1 [file egusphere-2022-1160-supplement.pdf]

## Supplementary Material

### Survey on geoscience communication practices and perceptions

| Indicator                      |                         | Question                                                                                                                                                                                                                                                                                                                                           |
|--------------------------------|-------------------------|----------------------------------------------------------------------------------------------------------------------------------------------------------------------------------------------------------------------------------------------------------------------------------------------------------------------------------------------------|
| <b>Biographical profile</b>    |                         |                                                                                                                                                                                                                                                                                                                                                    |
| <b>Biographical profile</b>    | Age                     | Q1. Age: < 30, 30-40, 40-50, > 50 years old                                                                                                                                                                                                                                                                                                        |
|                                | Gender                  | Q2. Gender: Female, Male, Other                                                                                                                                                                                                                                                                                                                    |
|                                | Academic context        | Q3. Academic degree                                                                                                                                                                                                                                                                                                                                |
|                                |                         | Q4. Degree area                                                                                                                                                                                                                                                                                                                                    |
|                                |                         | Q10. Did you receive any training in communication? Yes, no                                                                                                                                                                                                                                                                                        |
|                                | Area of expertise       | Q5. Area of expertise                                                                                                                                                                                                                                                                                                                              |
|                                |                         | Q6. How do you describe your scientific area? Pure; applied                                                                                                                                                                                                                                                                                        |
|                                | Professional category   | Q7. Professional Category: post graduation student; technician; researcher; elementary and secondary education teacher; higher education professor; other                                                                                                                                                                                          |
|                                | Professional experience | Q9. Professional experience: < 5, 5-10, 10-20, > 20 years                                                                                                                                                                                                                                                                                          |
|                                | Geographical context    | Q8. Location of the institution where you work                                                                                                                                                                                                                                                                                                     |
| <b>Experiences / Practices</b> |                         |                                                                                                                                                                                                                                                                                                                                                    |
| <b>Experiences / Practices</b> | Frequency               | Q12. How many science communication activities have you carried out in the last year? More than 10; 4-9; 1-3, none                                                                                                                                                                                                                                 |
|                                | Type of activities      | What kind of science communication activities do you usually promote?<br>(Never; rarely; usually; often)                                                                                                                                                                                                                                           |
|                                |                         | Q11.1 Field trips                                                                                                                                                                                                                                                                                                                                  |
|                                |                         | Q11.2 Visits to Museums                                                                                                                                                                                                                                                                                                                            |
|                                |                         | Q11.3 Visits to Science Centres                                                                                                                                                                                                                                                                                                                    |
|                                |                         | Q11.4 Visits to research institutions                                                                                                                                                                                                                                                                                                              |
|                                |                         | Q11.5 Workshops                                                                                                                                                                                                                                                                                                                                    |
|                                |                         | Q11.6 Exhibitions                                                                                                                                                                                                                                                                                                                                  |
|                                |                         | Q11.7 Public lectures                                                                                                                                                                                                                                                                                                                              |
|                                |                         | Q11.8 Public Debates / Clarification Sessions                                                                                                                                                                                                                                                                                                      |
|                                |                         | Q11.9 Science Exhibitions (exhibitions, fairs, ...)                                                                                                                                                                                                                                                                                                |
|                                |                         | Q11.10 Books                                                                                                                                                                                                                                                                                                                                       |
|                                |                         | Q11.11 Scientific papers                                                                                                                                                                                                                                                                                                                           |
|                                |                         | Q11.12 Popular science news articles                                                                                                                                                                                                                                                                                                               |
|                                |                         | Q11.13 Opinion articles                                                                                                                                                                                                                                                                                                                            |
|                                |                         | Q20. What kind of science communication initiatives in general have you participated in [Portuguese initiatives]?<br>Select: Science Cafes (Ciência Viva); '90 seconds science' (radio show); Tertúlias FNACiência (public talks); Pint of Science; PubHD; Scientific Culture Day; Science and Technology Week; European Researchers' Night; Other |
|                                |                         | Q21. What type of geoscience communication initiatives have you participated in [Portuguese initiatives]?<br>Select: Living Science in Summer – Geology in Summer; Geologist's Day; European Geoparks Week; Mine Route Week, Other                                                                                                                 |
|                                | Contexts                | In what contexts do you promote communication activities?<br>(Never; rarely; usually; often)                                                                                                                                                                                                                                                       |
|                                |                         | Q18.1 Formal (schools, universities, ...)                                                                                                                                                                                                                                                                                                          |
|                                |                         | Q18.2 Informal (museums, geosites, protected areas,...)                                                                                                                                                                                                                                                                                            |
|                                |                         | Q18.3 Unconventional (market, shopping centre, street,...)                                                                                                                                                                                                                                                                                         |
|                                |                         | Q22. Indicate the four places in Portugal where you carried out more geoscience communication activities                                                                                                                                                                                                                                           |
|                                | Audiences               | What audience do you usually communicate with?<br>(Never; rarely; usually; often)                                                                                                                                                                                                                                                                  |
|                                |                         | Q13.1 Journalists                                                                                                                                                                                                                                                                                                                                  |
|                                |                         | Q13.2 Science journalists                                                                                                                                                                                                                                                                                                                          |

|  |                                  |                                                                                                                                                                                                                                                                                                                                                                                                                                                                                                                                                  |
|--|----------------------------------|--------------------------------------------------------------------------------------------------------------------------------------------------------------------------------------------------------------------------------------------------------------------------------------------------------------------------------------------------------------------------------------------------------------------------------------------------------------------------------------------------------------------------------------------------|
|  |                                  | Q13.3 Students<br>Q13.4 Geosciences teachers<br>Q13.5 Teachers (other fields)<br>Q13.6 Geoscience technical professionals<br>Q13.7 Technical professionals (other fields)<br>Q13.8 Companies<br>Q13.9 Researchers in Geosciences<br>Q13.10 Researchers (other fields)<br>Q13.11 Families<br>Q13.12 Politicians<br>Q13.13 NGOs<br>Q13.14 Local communities<br>Q13.15 'General Public'                                                                                                                                                             |
|  | Peer communication               | What kind of science communication activities do you do, targeted at peers?<br>(Never; rarely; usually; often)<br>Q14.1 Scientific meetings and congresses<br>Q14.2 Scientific publications<br>Q14.3 Use of Academia platform<br>Q14.4 Use of LinkedIn Platform<br>Q14.5 Use of Researchgate Platform<br>Q14.6 Participation in online forums<br>Q28. Have you participated in scientific meetings/congress sessions dedicated to Science Communication? Yes, no<br>Q29. Have you made scientific publications on science communication? Yes, no |
|  | Institutional communication      | How do you participate in the communication of your institution (newsletter, internal newspaper, website, social media, etc.)?<br>(Never; rarely; usually; often)<br>Q15.1 Sending scientific content<br>Q15.2 Sending papers and recent research results<br>Q15.3 Disseminating the participation in scientific events<br>Q15.4 Disseminating of science communication activities                                                                                                                                                               |
|  | Communication with policy makers | What kind of science communication activities do you do, targeted at policy makers?<br>(Never; rarely; usually; often)<br>Q16.1 Clarification sessions<br>Q16.2 Meetings<br>Q16.3 Non-technical reports                                                                                                                                                                                                                                                                                                                                          |
|  | Media                            | What kind of science communication activities do you do, targeted at media?<br>(Never; rarely; usually; often)<br>Q17.1 Give an interview for the media (newspaper, radio or TV)<br>Q17.2 Participation in media debate<br>Q17.3 Sending a scientific press release<br>Q17.4 Text production for popular science magazines<br>Q17.5 Making opinion texts for non-specialist media<br>Q17.6 Support journalists in clarifying scientific questions                                                                                                |
|  | Participatory contexts           | Have you performed any of the following science communication activities?<br>(Never; 1 time; 2-3; more than 4 times)<br>Q19.1 Citizen Science Activity<br>Q19.2 Public clarification session<br>Q19.3 Debate with local communities<br>Q19.4 Focus groups                                                                                                                                                                                                                                                                                        |
|  | Geoparks                         | Q23. Have you already carried out any communication actions in a Geopark in Portugal? Yes, no<br>Q24. If you answered yes to the previous question (Q23), indicate which one(s)?                                                                                                                                                                                                                                                                                                                                                                 |
|  | Online platforms                 | Which online platforms do you use to communicate science?<br>(Never; rarely; usually; often)<br>Q25.1 Email<br>Q25.2 Personal blog<br>Q25.3 Institutional blog<br>Q25.4 Personal website<br>Q25.5 Institutional website<br>Q25.6 Facebook (personal account)<br>Q25.7 Facebook (institutional account)                                                                                                                                                                                                                                           |

|                                      |                                        |                                                                                                                                                                                                                                                                                                                                                                                                                                                                                                                                                                                                                                                                                                                                                                                                                                                                                                         |
|--------------------------------------|----------------------------------------|---------------------------------------------------------------------------------------------------------------------------------------------------------------------------------------------------------------------------------------------------------------------------------------------------------------------------------------------------------------------------------------------------------------------------------------------------------------------------------------------------------------------------------------------------------------------------------------------------------------------------------------------------------------------------------------------------------------------------------------------------------------------------------------------------------------------------------------------------------------------------------------------------------|
|                                      |                                        | <p>Q25.8 Twitter (personal account)</p> <p>Q25.9 Twitter (institutional account)</p> <p>Q25.10 YouTube (personal account)</p> <p>Q25.11 YouTube (institutional account)</p> <p>Q25.12 Instagram (personal account)</p> <p>Q25.13 Instagram (institutional account)</p>                                                                                                                                                                                                                                                                                                                                                                                                                                                                                                                                                                                                                                  |
|                                      |                                        | <p>What content related to Geosciences do you share on your social media?<br/>(Never; rarely; usually; often)</p> <p>Q26.1 Information related to work at my institution</p> <p>Q26.2 Information related to places where I do fieldwork</p> <p>Q26.3 Events in which I participate</p> <p>Q26.4 Events in my area that I find interesting, even if I don't participate</p> <p>Q26.5 News related to my work</p> <p>Q26.6 News related to colleagues I know</p> <p>Q26.7 Geoscience news that I find interesting</p> <p>Q26.8 Clarifications and opinions in discussion groups</p>                                                                                                                                                                                                                                                                                                                      |
|                                      | Geoscientific topics                   | Q27. Indicate three geosciences topics on which you do communication activities.                                                                                                                                                                                                                                                                                                                                                                                                                                                                                                                                                                                                                                                                                                                                                                                                                        |
| <b>Representations / Perceptions</b> |                                        |                                                                                                                                                                                                                                                                                                                                                                                                                                                                                                                                                                                                                                                                                                                                                                                                                                                                                                         |
| <b>Representations / Perceptions</b> | Perception of personal preparation     | <p>Q30.1 Do you feel with the necessary skills to communicate science?</p> <p>Q30.2 Do you feel prepared to communicate about the social and ethical implications of science?<br/>(Not prepared at all; moderately prepared; well prepared; very well prepared; I don't know)</p>                                                                                                                                                                                                                                                                                                                                                                                                                                                                                                                                                                                                                       |
|                                      | Position on responsibility             | <p>In your opinion,<br/>(Strongly disagree; moderately disagree; neither agree nor disagree; moderately agree; strongly agree)</p> <p>Q36.2 do scientists have a moral duty to engage with the non-expert public about the social and ethical implications of their work?</p> <p>Q36.5 would you like to be forced to take a public position on the issues raised by your work?</p>                                                                                                                                                                                                                                                                                                                                                                                                                                                                                                                     |
|                                      | Interest in training                   | Q31. How willing would you be to attend training on communication with journalists and the public? Very willing; moderately willing, not willing at all                                                                                                                                                                                                                                                                                                                                                                                                                                                                                                                                                                                                                                                                                                                                                 |
|                                      | Time                                   | Q32. Regarding your entire professional activity, how important is it for you to find time to engage with non-specialist audiences? Not at all important; not very important; equally important; quite important; very important                                                                                                                                                                                                                                                                                                                                                                                                                                                                                                                                                                                                                                                                        |
|                                      | Institution attitude                   | Q33. To what degree does your institution value communication activities? High; medium; low                                                                                                                                                                                                                                                                                                                                                                                                                                                                                                                                                                                                                                                                                                                                                                                                             |
|                                      | Objectives                             | <p>What are your goals when you communicate science?<br/>(Disagree; moderately agree; strongly agree)</p> <p>Q34.1 to make the importance of geosciences in everyday life known</p> <p>Q34.2 to show that geosciences are interesting</p> <p>Q34.3 to share my passion for geosciences</p> <p>Q34.4 to ensure that the public is better informed about science and technology</p> <p>Q34.5 to enable citizens to make more informed decisions</p> <p>Q34.6 to transmit the values of science</p> <p>Q34.7 to support policy makers</p> <p>Q34.8 to know people's opinion on geoscientific topics</p> <p>Q34.9 to make my work known</p> <p>Q34.10 to contribute to public debates about science</p> <p>Q34.11 to know the implication of geosciences and of my work in citizens' life</p> <p>Q34.12 to attract professionals to my area</p> <p>Q34.13 to promote the public image of my institution</p> |
|                                      | Motivations                            | <p>Why do you do science communication?<br/>(Disagree; moderately agree; strongly agree)</p> <p>Q35.1 It is part of my professional duties</p> <p>Q35.2 To attract research funding</p> <p>Q35.3 Because funded research projects require</p> <p>Q35.4 To respond the requests of my institution</p> <p>Q35.5 To respond to invitations (colleagues, journalists, teachers, entities)</p> <p>Q35.6 It is scientist's duty</p>                                                                                                                                                                                                                                                                                                                                                                                                                                                                           |
|                                      | Perceptions about the scientific field | In your opinion:                                                                                                                                                                                                                                                                                                                                                                                                                                                                                                                                                                                                                                                                                                                                                                                                                                                                                        |

|                                         |                                                                                                                                                                                                                                                                                                                                                                                                                                                                                                                                                                                                                                                                                                                                                                                                                                                                                                                                                               |
|-----------------------------------------|---------------------------------------------------------------------------------------------------------------------------------------------------------------------------------------------------------------------------------------------------------------------------------------------------------------------------------------------------------------------------------------------------------------------------------------------------------------------------------------------------------------------------------------------------------------------------------------------------------------------------------------------------------------------------------------------------------------------------------------------------------------------------------------------------------------------------------------------------------------------------------------------------------------------------------------------------------------|
|                                         | <p>Strongly disagree; moderately disagree; neither agree nor disagree; moderately agree; strongly agree</p> <p>Q36.1 Has your work implications for society and/or policy makers?</p> <p>Q36.3 Is your work interesting to non-specialist audiences?</p> <p>Q36.4 Is your work too specialized to make sense to non-specialist audiences?</p>                                                                                                                                                                                                                                                                                                                                                                                                                                                                                                                                                                                                                 |
| Obstacles                               | <p>What obstacles do you find in the science communication?<br/>(Disagree; moderately agree; strongly agree)</p> <p>Q37.1 lack of time</p> <p>Q37.2 lack of financial support</p> <p>Q37.3 discomfort in communicating with lay audiences</p> <p>Q37.4 lack of preparation/training</p> <p>Q37.5 lack of public interest</p> <p>Q37.6 lack of public knowledge</p> <p>Q37.7 negative opinion by peers</p> <p>Q37.8 these activities make science less rigorous</p> <p>Q37.9 the complexity of my scientific field</p> <p>Q37.10 fear of creating misunderstandings and generating controversy</p> <p>Q37.11 misrepresentation of scientific content by journalists</p>                                                                                                                                                                                                                                                                                        |
| Perception on geoscientific topics      | <p>Which geoscience topic do you consider:</p> <p>Q38 most pertinent to communicate?</p> <p>Q39 most difficult to communicate?</p> <p>Q40 easier to communicate?</p> <p>Q41 more attractive to communicate?</p>                                                                                                                                                                                                                                                                                                                                                                                                                                                                                                                                                                                                                                                                                                                                               |
| Effectiveness of communication channels | <p>Q42 List the most effective communication channels in science communication<br/>(List from 1-12)</p> <p>Book, Leaflet/Brochure, Panel, Interactive module, Game, Video, Social media post, News in the media, Scientific paper, Popular science article, Public debate, TV interview</p>                                                                                                                                                                                                                                                                                                                                                                                                                                                                                                                                                                                                                                                                   |
| Media                                   | <p>In your opinion:<br/>(Strongly disagree; moderately disagree; neither agree nor disagree; moderately agree; strongly agree)</p> <p>Q43.1 The news coverage on geoscience is adequate.</p> <p>Q43.2 The media are more interested in negative stories about geoscience.</p> <p>Q43.3 The media are more interested in sensationalism than scientific truth.</p> <p>Q43.4 Geosciences are too complex to be communicated in the media.</p> <p>Q43.5 Journalists are not scientifically prepared to work on geoscience topics.</p> <p>Q43.6 Journalists do not correctly understand the technical details of science.</p> <p>Q43.7 Most geoscientists fail to adapt their speech for journalists and for the public.</p> <p>Q36.6 In your opinion, engagement with non-specialist audiences is better done by trained professionals and journalists? Strongly disagree; moderately disagree; neither agree nor disagree; moderately agree; strongly agree</p> |
| Trust in information                    | <p>Which entities do you trust to do geosciences communication<br/>(I don't trust; I trust a little; I trust; I trust a lot)</p> <p>Q44.1 Museums</p> <p>Q44.2 Science Centres</p> <p>Q44.3 Universities</p> <p>Q44.4 Geoparks</p> <p>Q44.5 City councils</p> <p>Q44.6 Governmental institutions</p> <p>Q44.7 Elementary and secondary schools</p> <p>Q44.8 TV</p> <p>Q44.9 Newspapers</p> <p>Q44.10 Popular science magazines</p>                                                                                                                                                                                                                                                                                                                                                                                                                                                                                                                            |
| Personal experience and satisfaction    | <p>Q36.7 In your opinion, engaging non-specialist audiences in science is personally rewarding. Strongly disagree; moderately disagree; neither agree nor disagree; moderately agree; strongly agree</p> <p>Q45. What do you think about the number of activities you do annually? Reduced; fair; good; very good; excessive</p> <p>Q46. How do you rate your communicator experience? Unsatisfactory; satisfactory; very Satisfactory</p>                                                                                                                                                                                                                                                                                                                                                                                                                                                                                                                    |

## Supplementary Material

### Tables with the model coefficients

Parameter Estimates

| Q12_Activities <sup>a</sup> |                           | B              | Std. Error | Wald  | df | Sig. | Exp(B)    | 95% Confidence Interval for Exp(B) |              |
|-----------------------------|---------------------------|----------------|------------|-------|----|------|-----------|------------------------------------|--------------|
|                             |                           |                |            |       |    |      |           | Lower Bound                        | Upper Bound  |
| nenhum                      | Intercept                 | ,195           | 1,435      | ,018  | 1  | ,892 |           |                                    |              |
|                             | [Q9_Work_Experience=1]    | 1,629          | 1,220      | 1,782 | 1  | ,182 | 5,097     | ,467                               | 55,686       |
|                             | [Q9_Work_Experience=2]    | 4,423          | 1,704      | 6,736 | 1  | ,009 | 83,377    | 2,953                              | 2354,045     |
|                             | [Q9_Work_Experience=3]    | -,122          | 1,107      | ,012  | 1  | ,912 | ,885      | ,101                               | 7,750        |
|                             | [Q9_Work_Experience=4]    | 0 <sup>b</sup> | .          | .     | 0  | .    | .         | .                                  | .            |
|                             | [Q33_Appreciation=1]      | -5,395         | 1,743      | 9,583 | 1  | ,002 | ,005      | ,000                               | ,138         |
|                             | [Q33_Appreciation=2]      | -2,006         | ,987       | 4,133 | 1  | ,042 | ,135      | ,019                               | ,930         |
|                             | [Q33_Appreciation=3]      | 0 <sup>b</sup> | .          | .     | 0  | .    | .         | .                                  | .            |
|                             | [Q37_2_Lack_Support=1]    | 1,760          | 1,234      | 2,036 | 1  | ,154 | 5,812     | ,518                               | 65,223       |
|                             | [Q37_2_Lack_Support=2]    | -,323          | ,868       | ,139  | 1  | ,710 | ,724      | ,132                               | 3,968        |
|                             | [Q37_2_Lack_Support=3]    | 0 <sup>b</sup> | .          | .     | 0  | .    | .         | .                                  | .            |
|                             | [Q46_SciCom_Experience=1] | 2,886          | 1,219      | 5,604 | 1  | ,018 | 17,919    | 1,643                              | 195,403      |
|                             | [Q46_SciCom_Experience=2] | 1,037          | 1,033      | 1,009 | 1  | ,315 | 2,822     | ,373                               | 21,367       |
|                             | [Q46_SciCom_Experience=3] | 0 <sup>b</sup> | .          | .     | 0  | .    | .         | .                                  | .            |
|                             | [Q5_Expertise=1]          | -4,429         | 1,895      | 5,461 | 1  | ,019 | ,012      | ,000                               | ,489         |
|                             | [Q5_Expertise=2]          | -1,580         | 1,191      | 1,758 | 1  | ,185 | ,206      | ,020                               | 2,128        |
|                             | [Q5_Expertise=3]          | -21,707        | 9804,614   | ,000  | 1  | ,998 | 3,741E-10 | ,000                               | <sup>c</sup> |
|                             | [Q5_Expertise=4]          | -20,609        | ,000       | .     | 1  | .    | 1,121E-9  | 1,121E-9                           | 1,121E-9     |

|     |                           |                |       |        |   |      |        |       |         |
|-----|---------------------------|----------------|-------|--------|---|------|--------|-------|---------|
| 1-3 | Intercept                 | -2,661         | 1,143 | 5,423  | 1 | ,020 |        |       |         |
|     | [Q9_Work_Experience=1]    | -1,074         | ,679  | 2,502  | 1 | ,114 | ,342   | ,090  | 1,293   |
|     | [Q9_Work_Experience=2]    | 3,731          | 1,283 | 8,457  | 1 | ,004 | 41,716 | 3,375 | 515,598 |
|     | [Q9_Work_Experience=3]    | ,069           | ,565  | ,015   | 1 | ,902 | 1,072  | ,354  | 3,241   |
|     | [Q9_Work_Experience=4]    | 0 <sup>b</sup> | .     | .      | 0 | .    | .      | .     | .       |
|     | [Q33_Appreciation=1]      | -,301          | ,811  | ,137   | 1 | ,711 | ,740   | ,151  | 3,629   |
|     | [Q33_Appreciation=2]      | ,288           | ,797  | ,131   | 1 | ,718 | 1,334  | ,280  | 6,368   |
|     | [Q33_Appreciation=3]      | 0 <sup>b</sup> | .     | .      | 0 | .    | .      | .     | .       |
|     | [Q37_2_Lack_Support=1]    | -1,568         | ,869  | 3,257  | 1 | ,071 | ,208   | ,038  | 1,144   |
|     | [Q37_2_Lack_Support=2]    | -,417          | ,463  | ,812   | 1 | ,367 | ,659   | ,266  | 1,633   |
|     | [Q37_2_Lack_Support=3]    | 0 <sup>b</sup> | .     | .      | 0 | .    | .      | .     | .       |
|     | [Q46_SciCom_Experience=1] | 3,826          | ,791  | 23,371 | 1 | ,000 | 45,878 | 9,726 | 216,398 |
|     | [Q46_SciCom_Experience=2] | 1,817          | ,622  | 8,532  | 1 | ,003 | 6,151  | 1,818 | 20,815  |
|     | [Q46_SciCom_Experience=3] | 0 <sup>b</sup> | .     | .      | 0 | .    | .      | .     | .       |
|     | [Q5_Expertise=1]          | ,275           | ,855  | ,104   | 1 | ,747 | 1,317  | ,247  | 7,036   |
|     | [Q5_Expertise=2]          | ,441           | ,819  | ,290   | 1 | ,590 | 1,554  | ,312  | 7,735   |
|     | [Q5_Expertise=3]          | ,750           | ,872  | ,739   | 1 | ,390 | 2,117  | ,383  | 11,696  |
|     | [Q5_Expertise=4]          | ,997           | 1,045 | ,910   | 1 | ,340 | 2,711  | ,349  | 21,040  |
|     | [Q5_Expertise=5]          | 1,675          | ,883  | 3,595  | 1 | ,058 | 5,338  | ,945  | 30,149  |
|     | [Q5_Expertise=6]          | 0 <sup>b</sup> | .     | .      | 0 | .    | .      | .     | .       |

a. The reference category is: >4.

b. This parameter is set to zero because it is redundant.
